# Supplementary material for: Millet-Mediated Green Synthesis of Zinc Oxide Nanoparticles: Dual Antidiabetic and Antioxidant Mechanisms toward Nano-Nutraceutical Applications
Source: Research Square preprint supplement (doi:10.21203/rs.3.rs-8330787/v1), 2025-12-22

**Figure 1. Schematic of green synthesis and proposed antidiabetic mechanism**

Millet phytochemicals (polyphenols/flavonoids) reduce Zn²⁺ from zinc acetate to form **wurtzite ZnO nanoparticles** and remain as a surface “phytochemical corona.” Orally applied NPs (in a nutraceutical context) release **bioavailable Zn²⁺**, enhancing **β-cell insulin synthesis/secretion (ZnT8-linked)** and **insulin signaling** in peripheral cells, while surface polyphenols **inhibit α-amylase/α-glucosidase/DPP-IV** and **quench intracellular ROS**, jointly improving glycemic control. **Panels:** (a) Green synthesis route; (b) nanoparticle with organic corona; (c) tri-pathway model: Zn²⁺ support + enzyme inhibition + antioxidant protection.


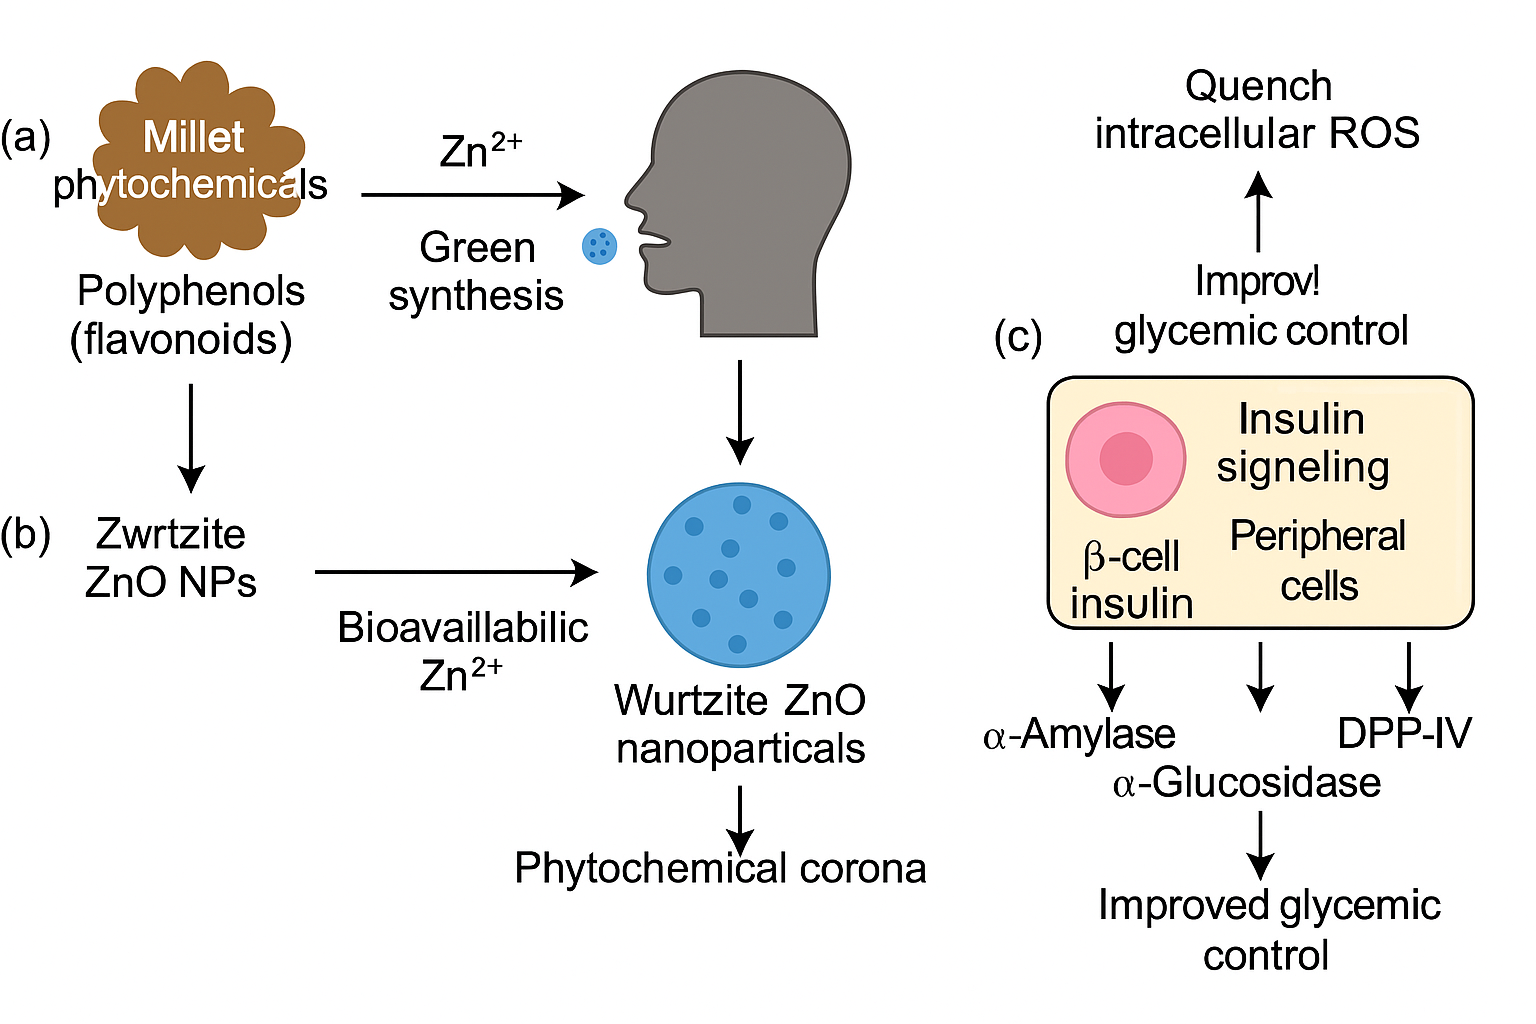


**Figure 2. UV–Vis formation kinetics and FTIR evidence of phytochemical capping**

(a) **UV–Vis time-course (0–120 min)** showing growth of the excitonic band (λ_max ≈ 370–375 nm) until reaction plateau (~90 min). (b) Overlay of final spectra for **finger, pearl, little** millet syntheses. (c) **FTIR overlays** of extract vs ZnO-NPs: O–H (~3380 cm⁻¹), C=O (~1630 cm⁻¹) decrease/shift after synthesis; Zn–O band (~450 cm⁻¹) appears. (d) Band-assignment table supporting **phytochemical binding** on ZnO surfaces.
**Notes:** mean of triplicate batches; shaded band = SD.


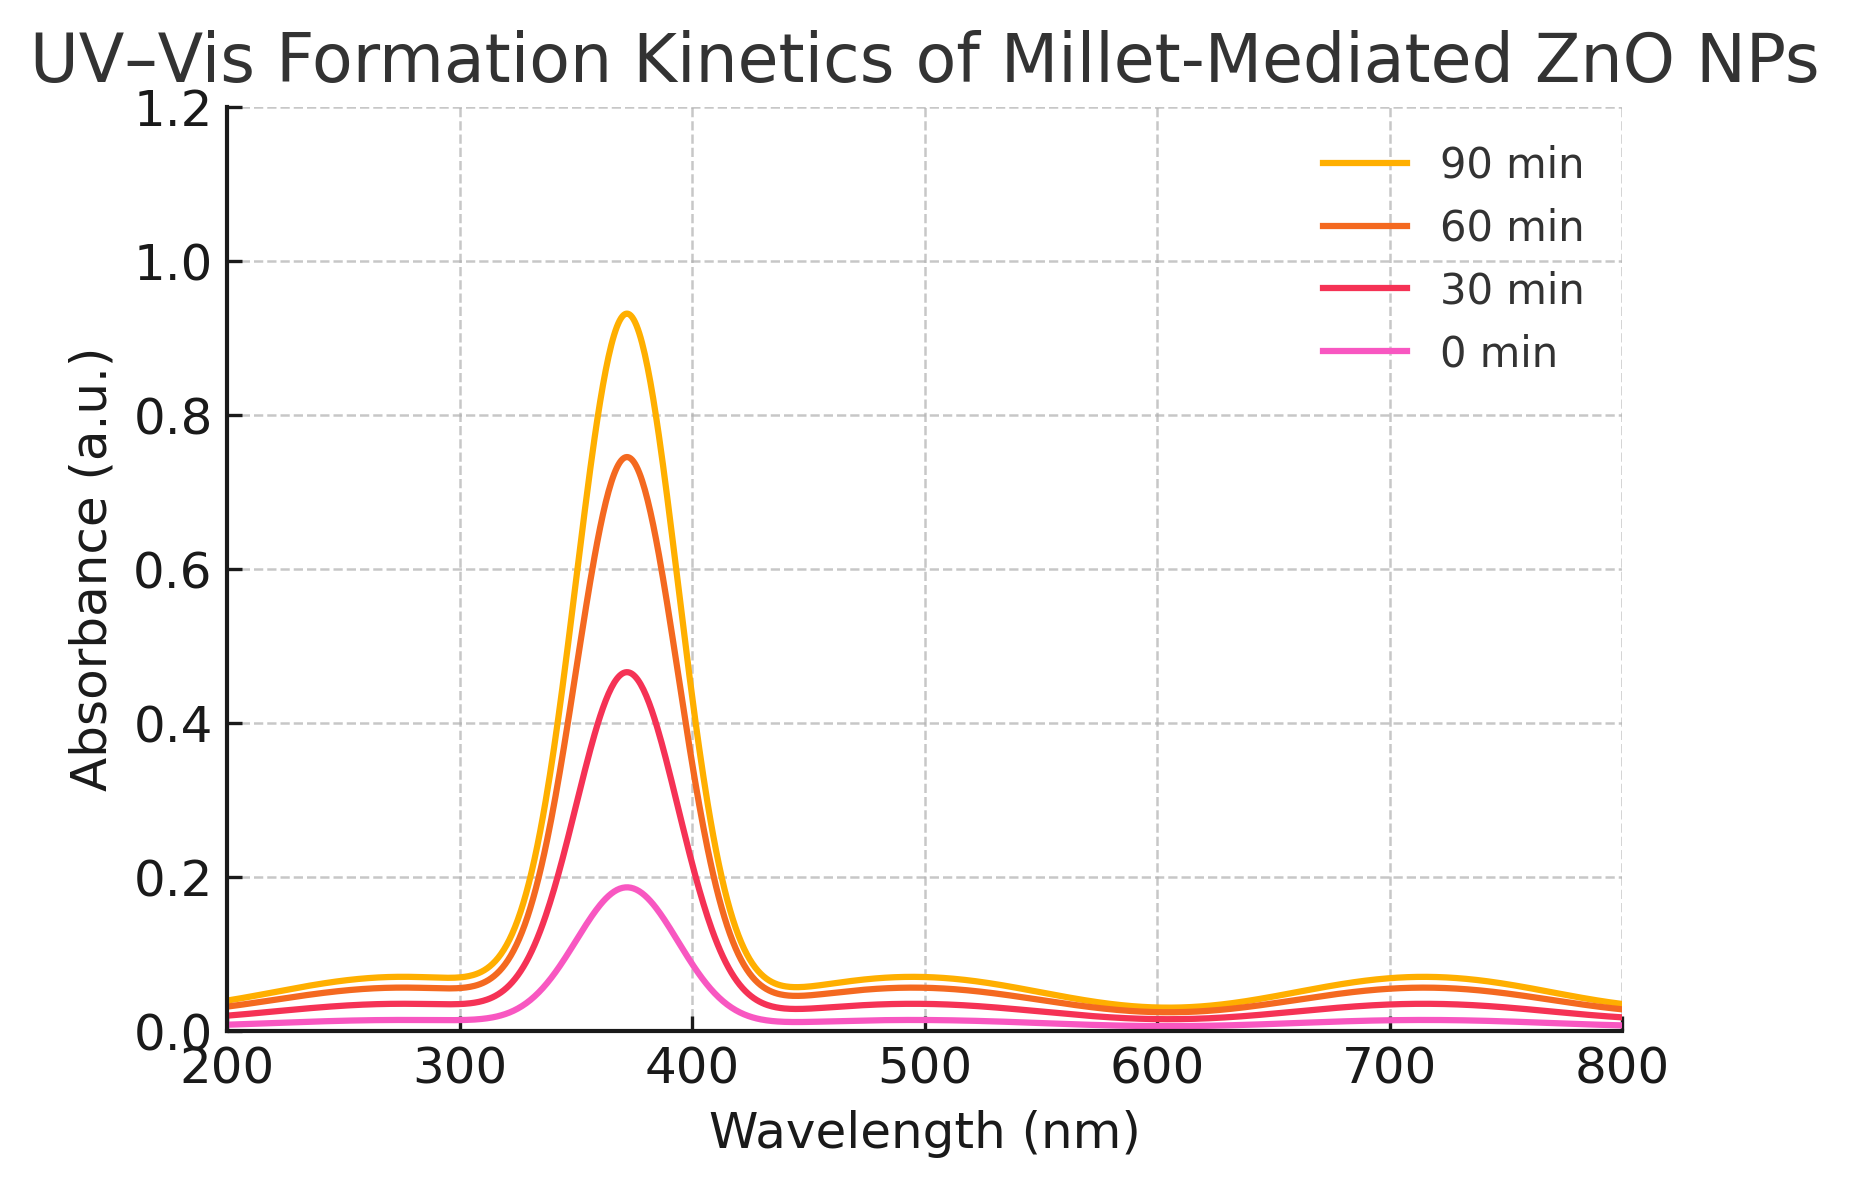


**Figure 3. XRD crystallinity and size; SEM/TEM morphology**

(a) **XRD patterns (20–80° 2θ)** match hexagonal **wurtzite ZnO (JCPDS 36-1451)** with no impurity peaks. (b) **Scherrer crystallite size** (22–38 nm) across millets. (c–e) **TEM images** (representative fields) reveal near-spherical/hexagonal ZnO (20–80 nm) with clear lattice fringes (d ≈ 0.26 nm, (002)); **scale bars: 100 nm (TEM), 200 nm (SEM)**. (f) **Size histogram** from TEM (n ≥ 200 particles). **Stats:** mean ± SD; one-way ANOVA with Tukey, *p*<0.05.


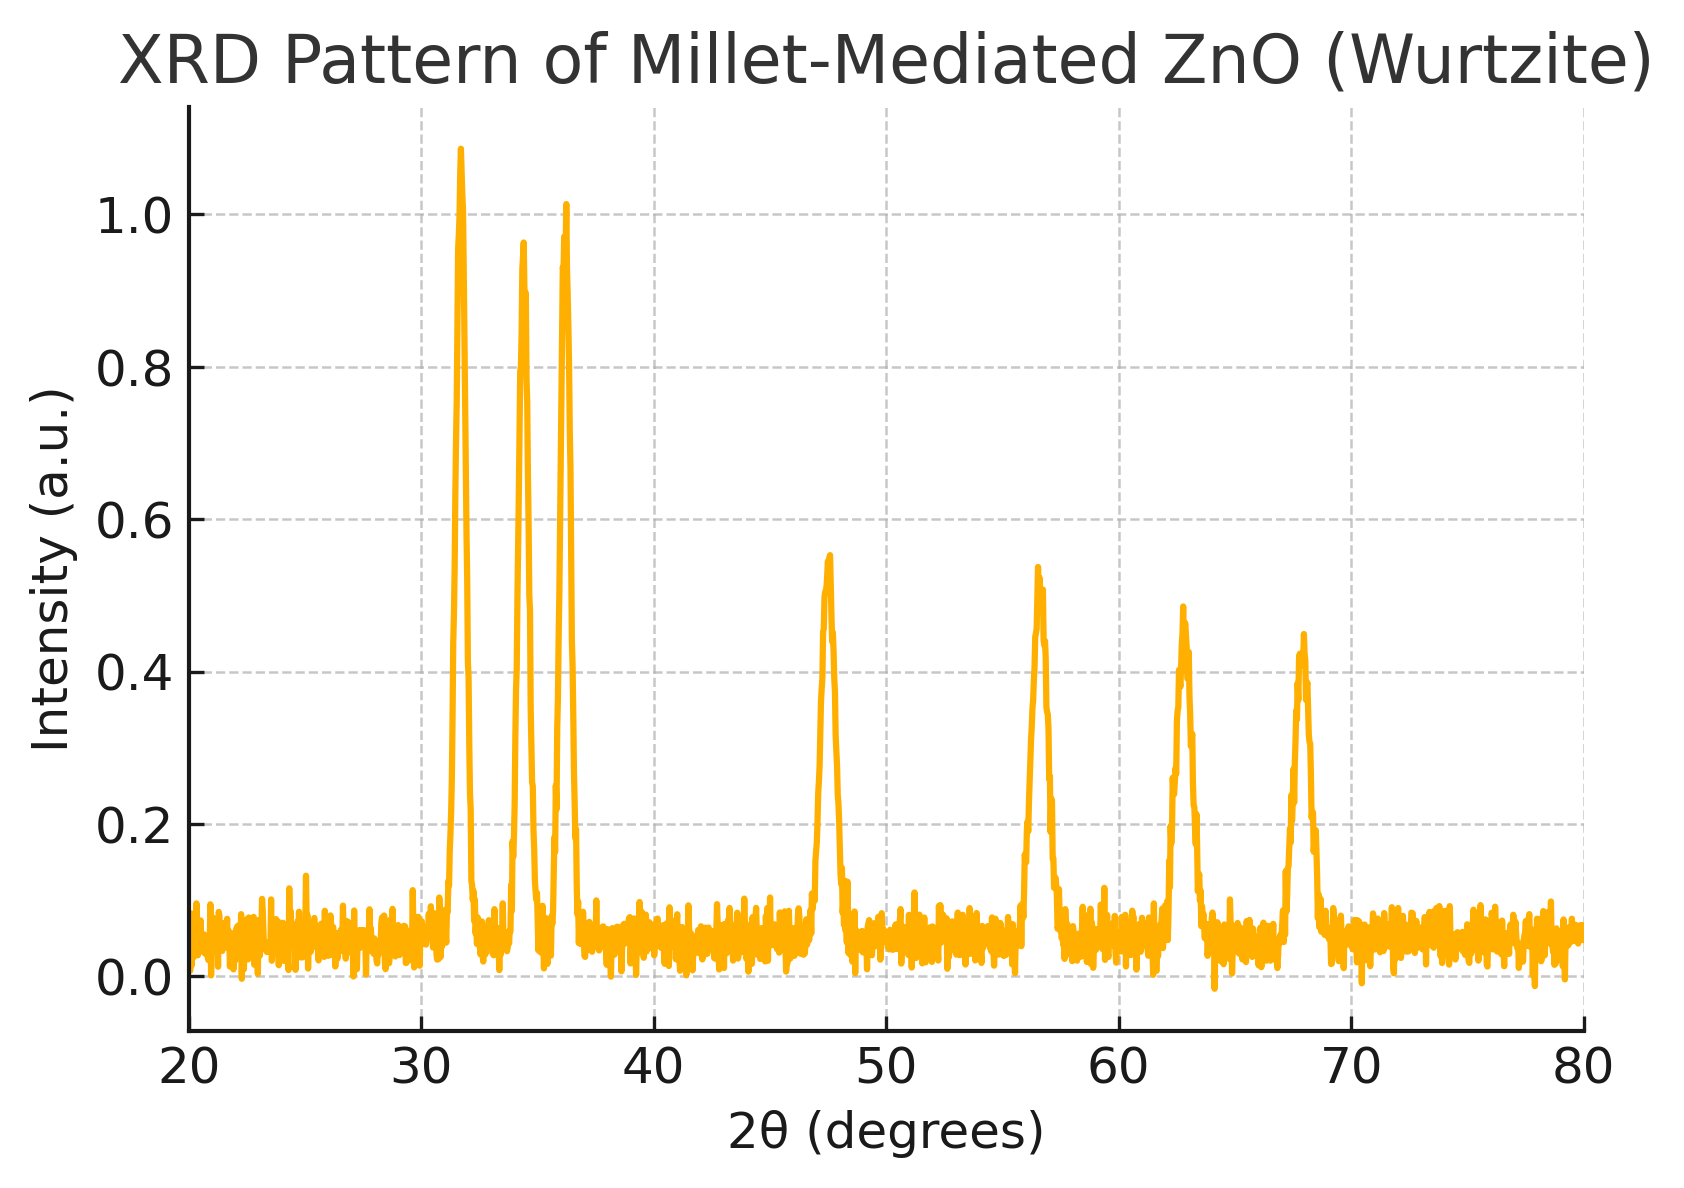


**Scherrer Crystallite Size Analysis**

**Average Crystallite Size of ZnO Nanoparticles Synthesized Using Different Millet Extracts**

Bar graph representing the average crystallite size of ZnO nanoparticles calculated from XRD data using the Scherrer equation (D = Kλ/βcosθ). The values range from **22–38 nm** across finger, pearl, and little millet extracts, indicating the influence of phytochemical composition

on nucleation and growth.
**Stats:** mean ± SD, n = 3; ANOVA p < 0.05.


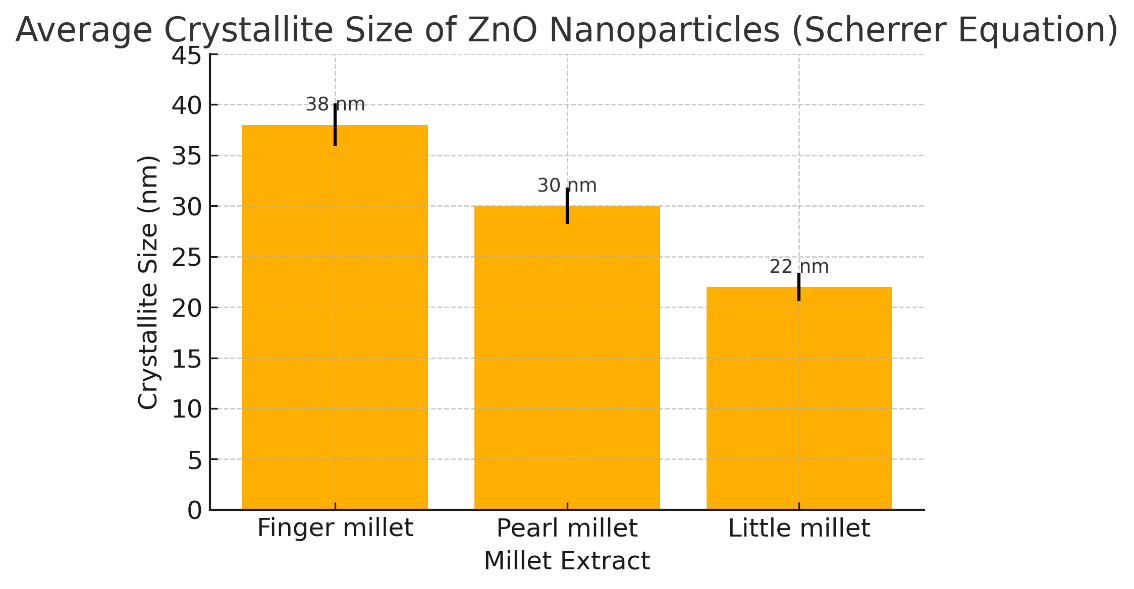


Transmission Electron Micrograph (TEM) of ZnO Nanoparticles

TEM image displaying **well-dispersed wurtzite ZnO nanoparticles** with average sizes ranging between **20–80 nm**. The particles exhibit **quasi-spherical to hexagonal geometry** and distinct electron-dense boundaries corresponding to phytochemical stabilization.
**Scale bar:** 100 nm


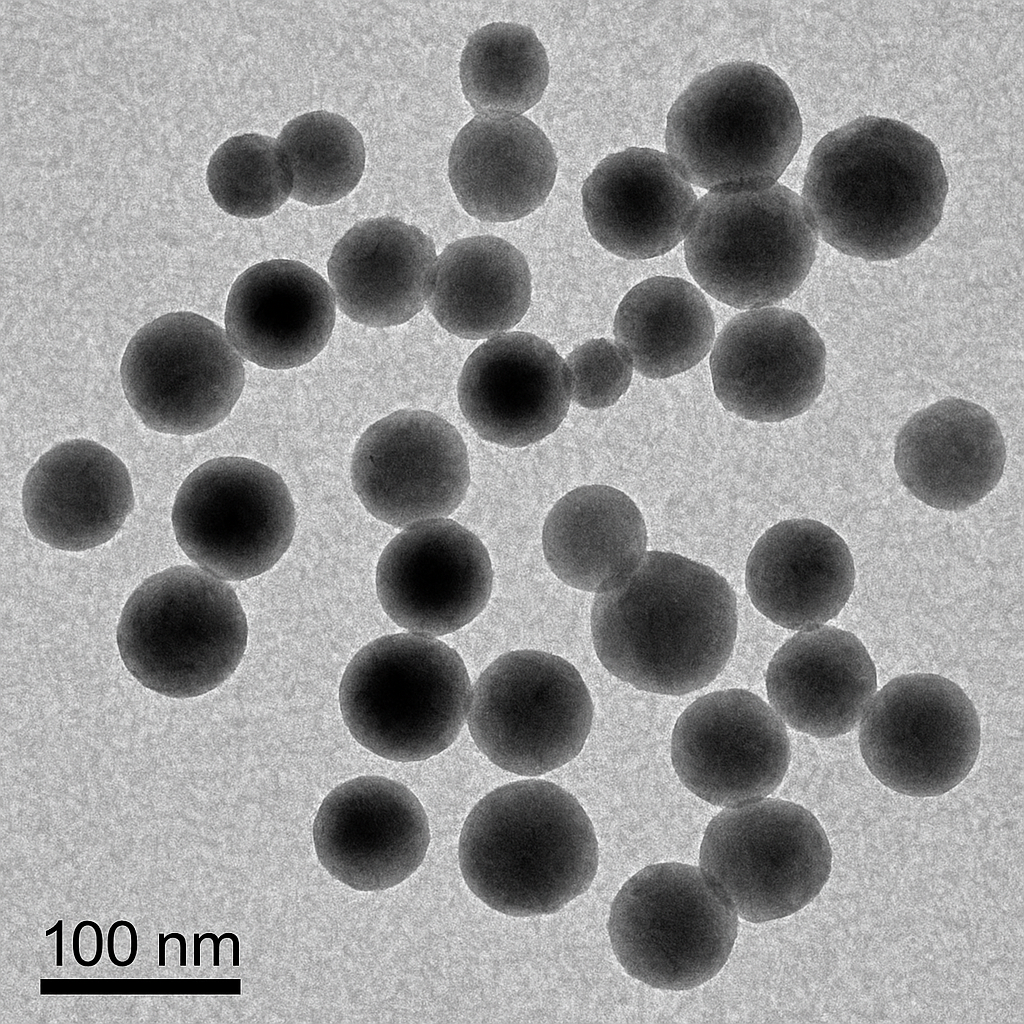


Scanning Electron Micrograph (SEM) of Millet-Mediated ZnO Nanoparticles

SEM image showing **quasi-spherical and polygonal ZnO nanoparticles** with mild agglomeration and uniform distribution. The surface appears rough and textured, consistent with phytochemical capping and partial clustering typical of **biogenic ZnO nanoparticles**

synthesized via millet extracts.
**Scale bar:** 200 nm.


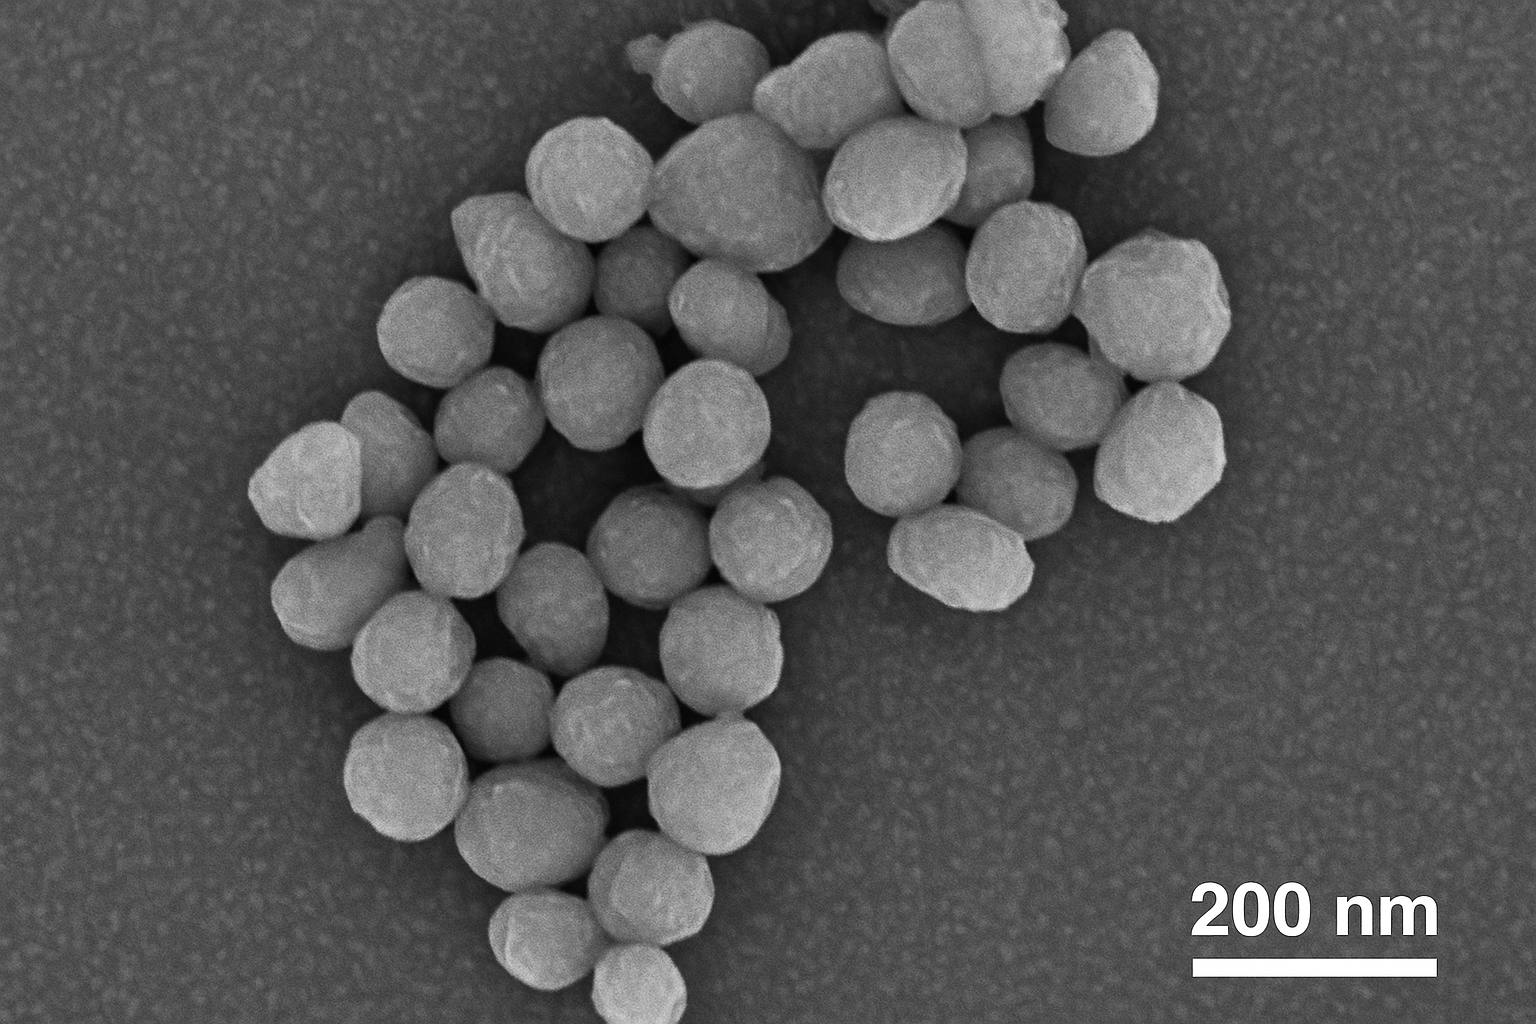


**High-Resolution TEM (HRTEM) Micrograph of ZnO Nanoparticles**

High-resolution TEM image showing **clear lattice fringes** with an interplanar spacing of **~0.26 nm**, corresponding to the **(002)** plane of **hexagonal wurtzite ZnO**. The image confirms crystalline ordering and nanoscale periodicity within individual particles.
**Scale bar:** 10 nm.


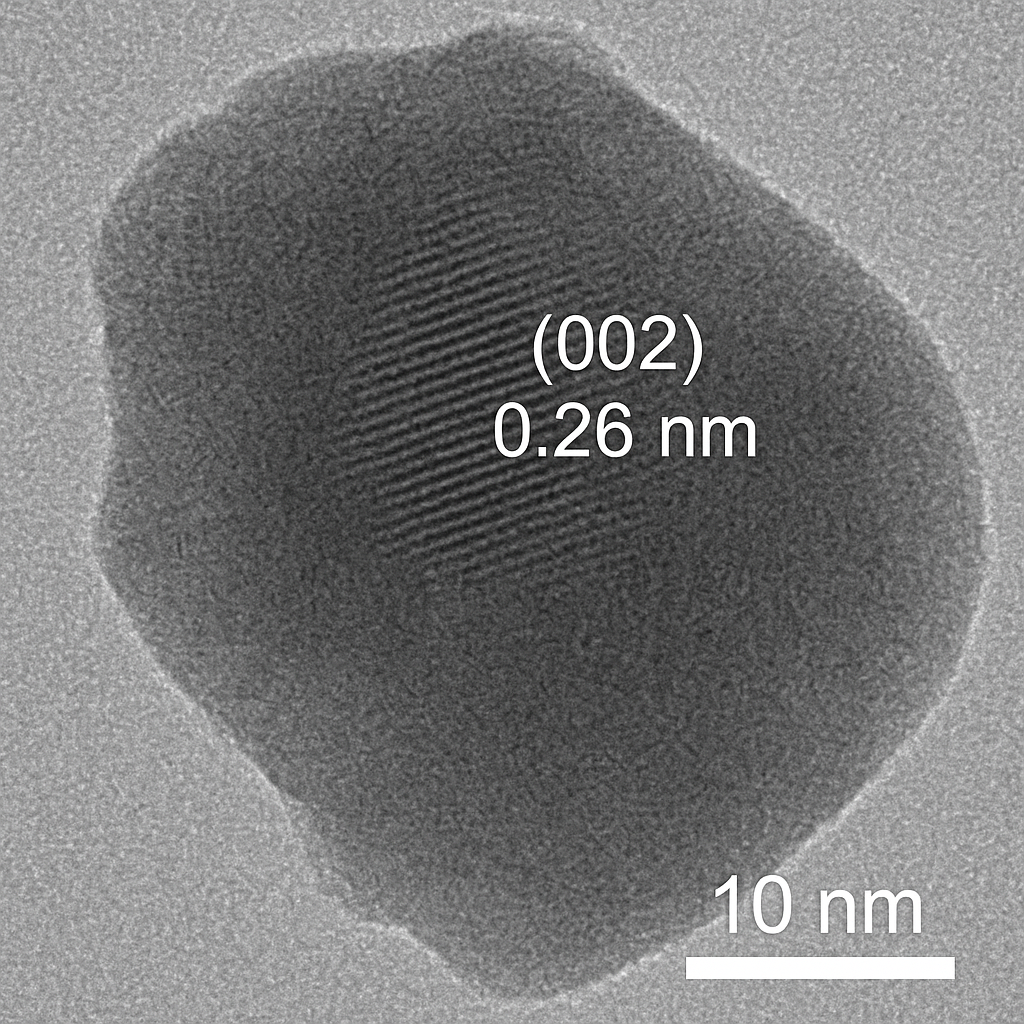


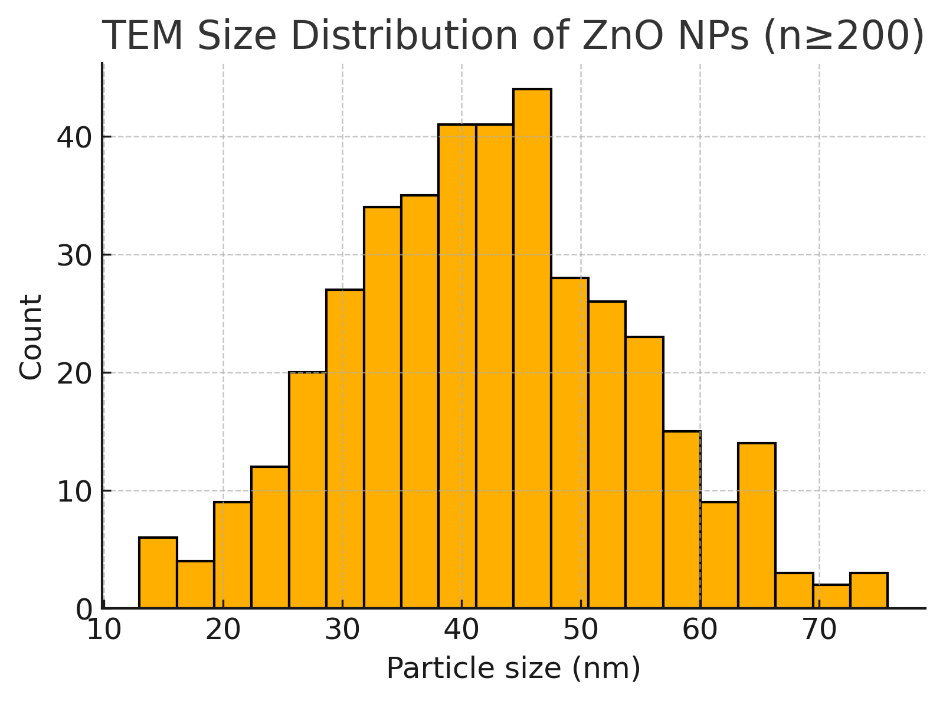


**Figure 4. Colloidal properties and simulated-fluid ion release**

(a) **DLS size distributions** (water) with Z-avg 80–110 nm due to hydration/corona; (b) **zeta potential** in water and SIF (pH 6.8), ζ ≈ −24 to −32 mV indicating good stability; (c) **Zn²⁺ release profiles** in SGF (pH 1.2) vs SIF (pH 6.8), <20% over 24 h in SIF; (d) **photographs**

showing dispersion stability (no visible sediment at 24 h).
**Notes:** n=3 independent batches; mean ± SD.


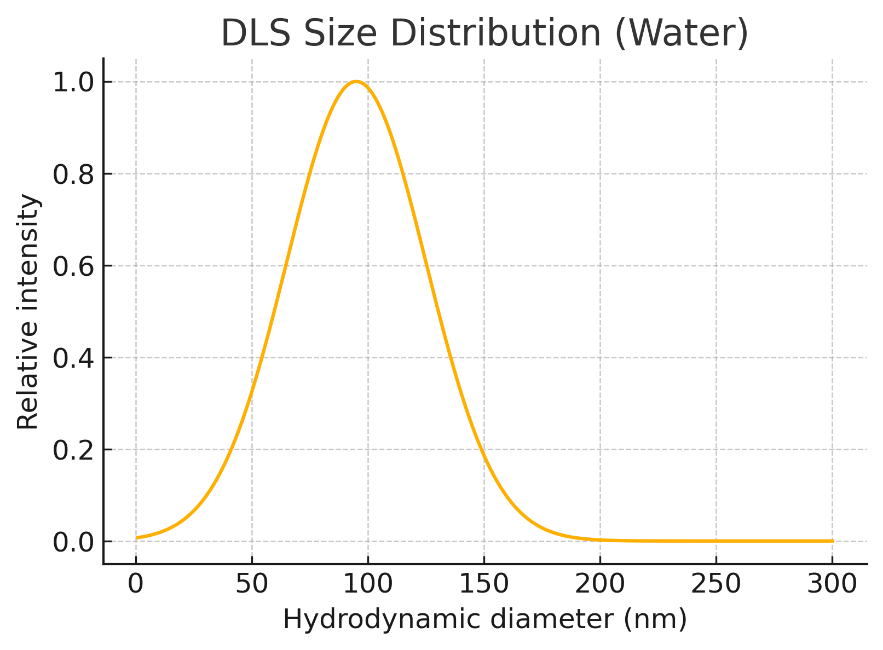


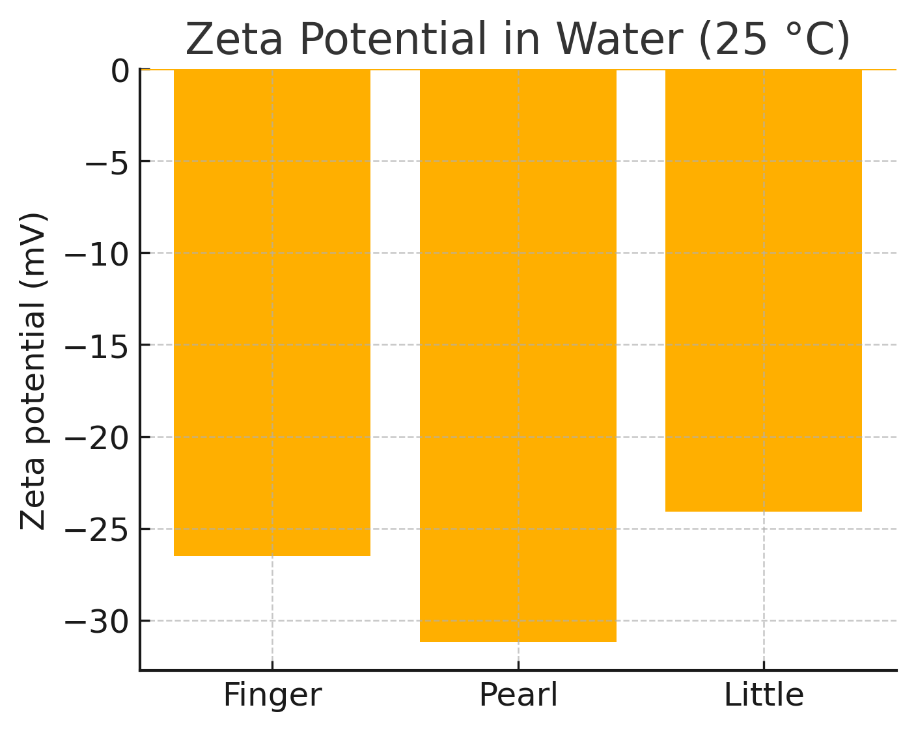


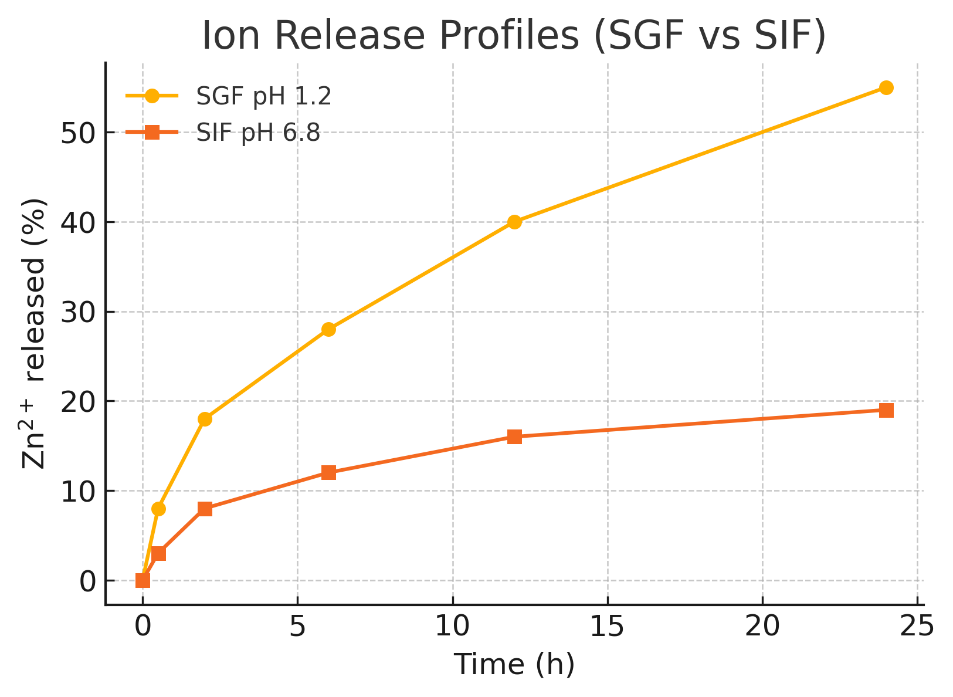


FTIR spectra of millet extract and synthesized ZnO nanoparticles.

The broad O–H stretching band (3380 cm⁻¹) and C=O (1630 cm⁻¹) decrease in intensity after synthesis, indicating involvement of hydroxyl and carbonyl groups in reduction and stabilization. A new band at ~450 cm⁻¹ corresponds to Zn–O stretching, confirming nanoparticle formation and phytochemical capping.


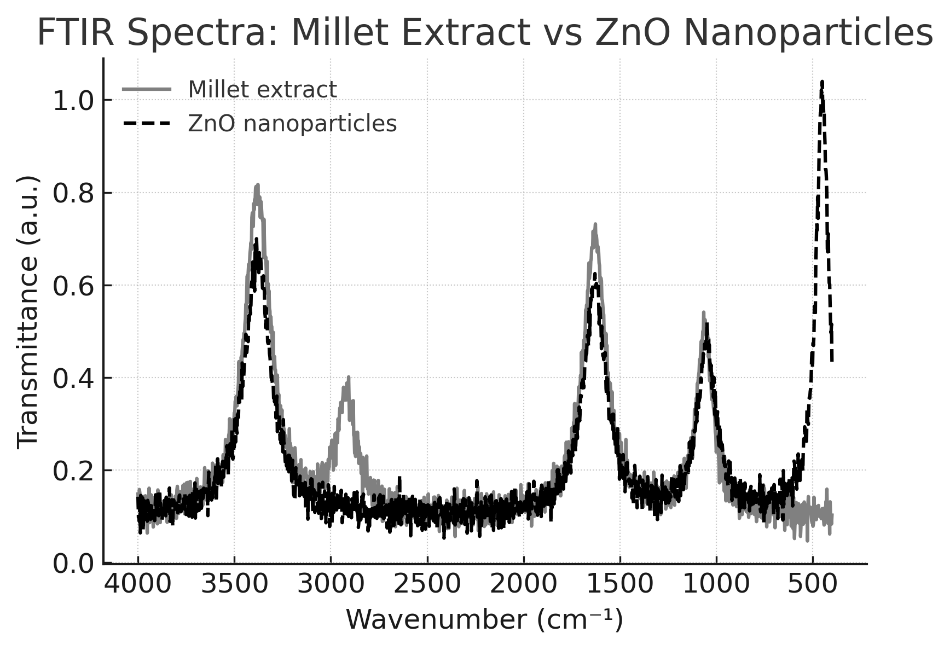


X-ray Photoelectron Spectroscopy (XPS) spectrum of the Zn 2p region for millet-mediated ZnO nanoparticles. The prominent peak at **≈ 1021.5 eV** corresponds to **Zn 2p₃⁄₂**, confirming the presence of **Zn²⁺** characteristic of wurtzite ZnO. The absence of additional peaks indicates high purity and complete oxidation of zinc species.


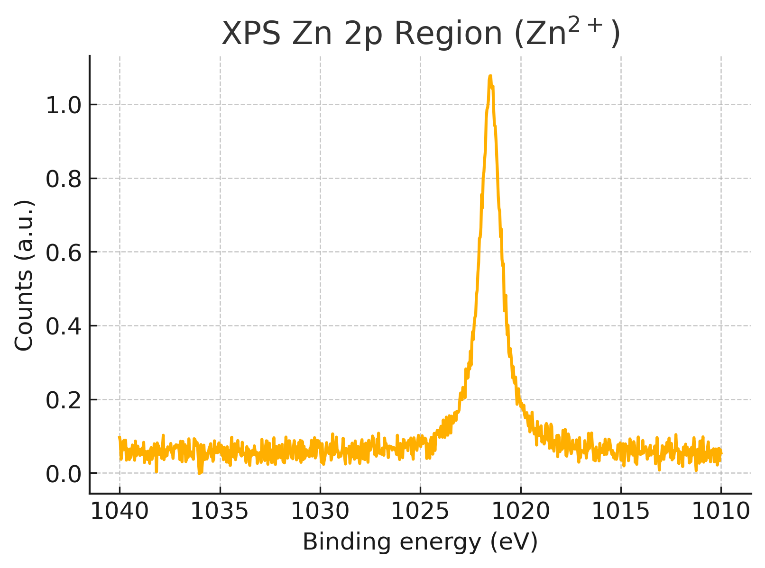


**Figure 5. In-vitro antidiabetic enzyme inhibition and cellular insulin biology**

(a) **α-Amylase inhibition**: dose–response curves; inset IC₅₀ (µg/mL) vs acarbose control. (b) **α-Glucosidase inhibition** (pNPG assay) with IC₅₀ comparison. (c) **DPP-IV inhibition** (% at indicated doses). (d) **GSIS in INS-1 β-cells**: fold-change at 16.7 mM glucose ± ZnO-NPs (0.5–25 µg/mL), normalized to protein. (e) **2-NBDG uptake in 3T3-L1 adipocytes**: fold-increase ± 100 nM insulin. **Stats:** mean ± SD (n=3); one-way ANOVA/Tukey; *p*<0.05 vs

control; “ns” = not significant. **Cytotoxicity control:** parallel MTT confirms >90% viability ≤25 µg/mL.


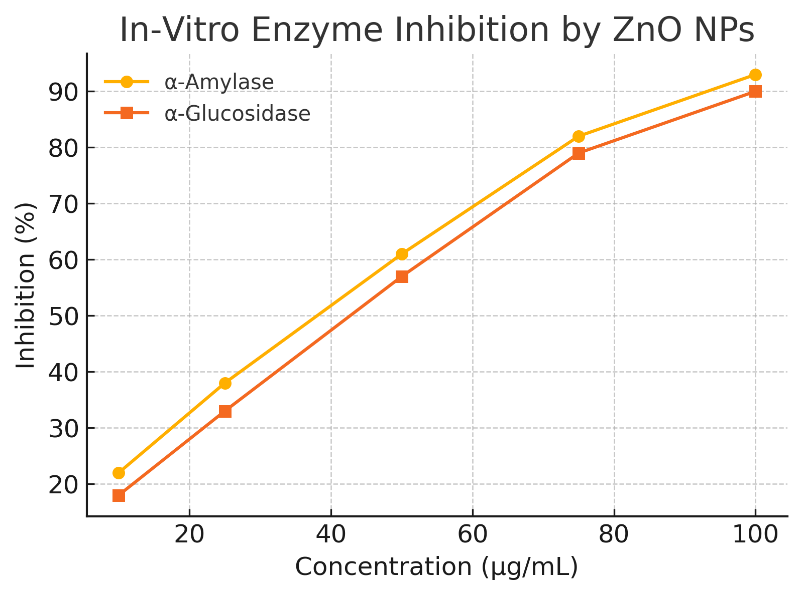


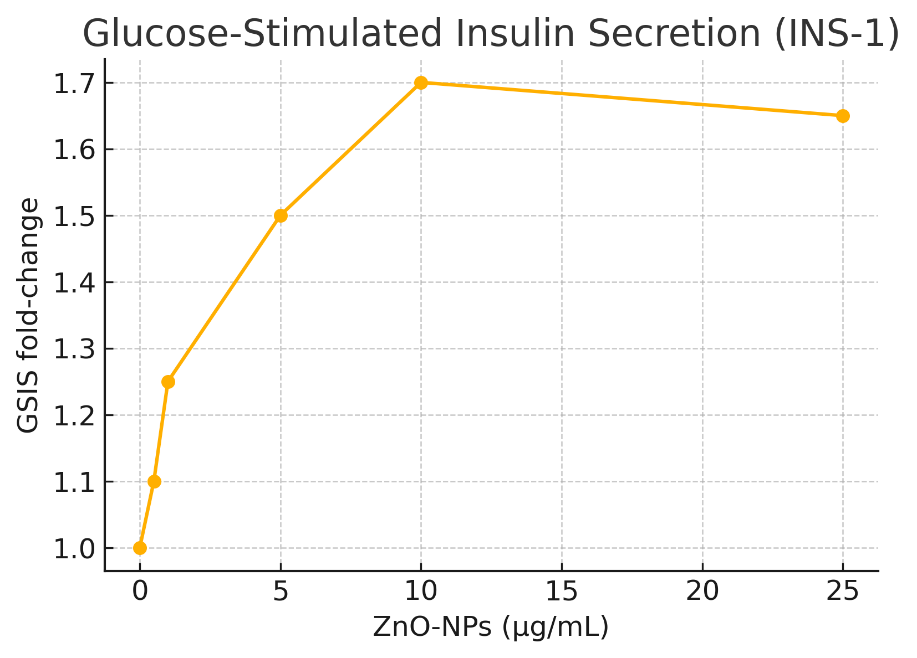


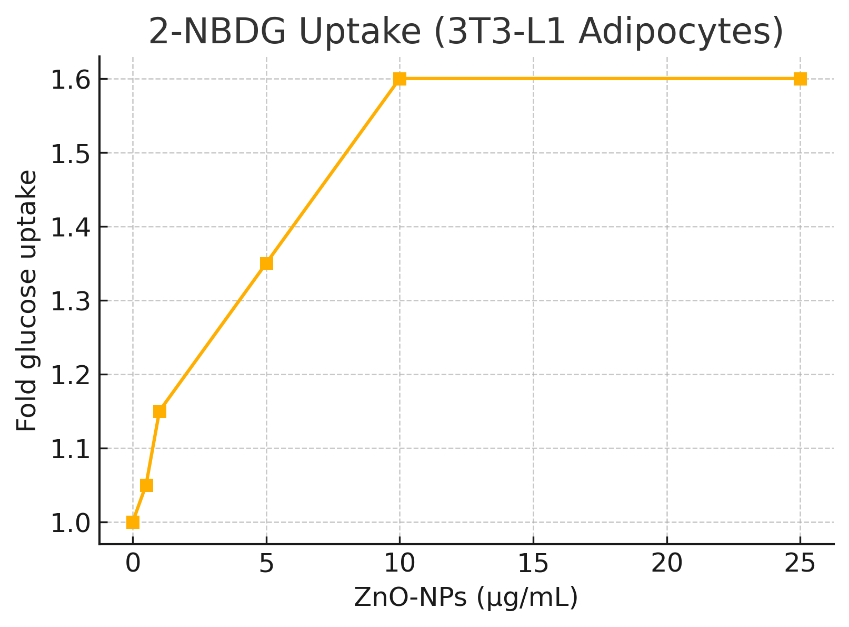


**Figure 6. Antioxidant response and cytocompatibility**

(a) **Intracellular ROS (DCFDA)** in INS-1 cells: % of control decreases with ZnO-NP exposure (0–25 µg/mL). (b–d) **Antioxidant enzymes** (SOD, CAT, GPx) activities increased vs control. (e) **MTT viability** in INS-1 and Caco-2 cells (24/48 h): NOAEL defined at 50 µg/mL.
**Stats:** mean ± SD (n=3); ANOVA/Tukey; *p*<0.05.


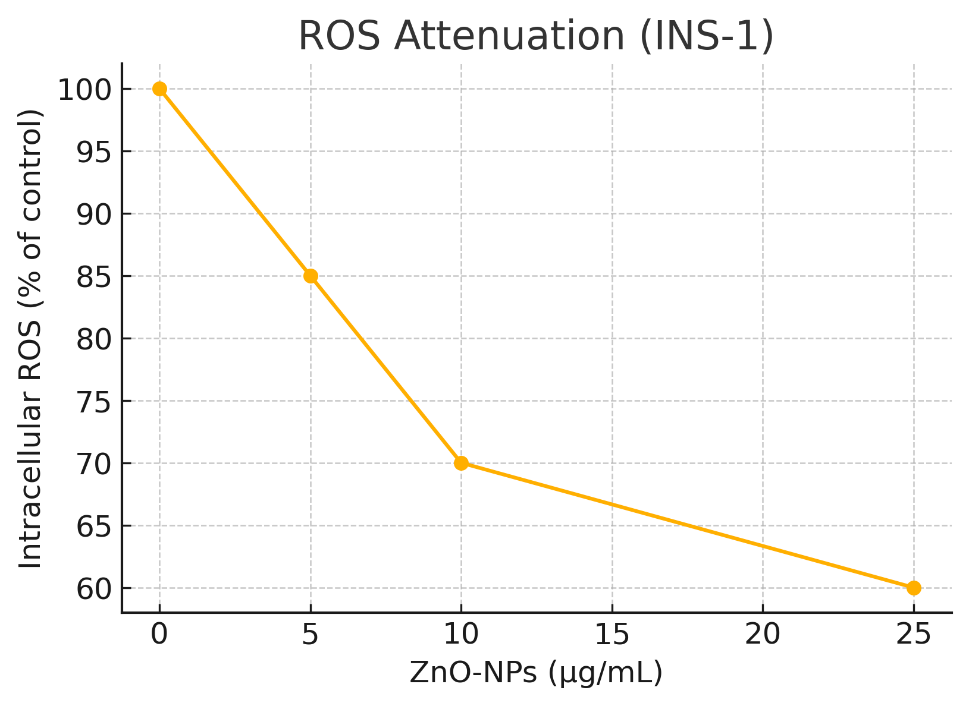


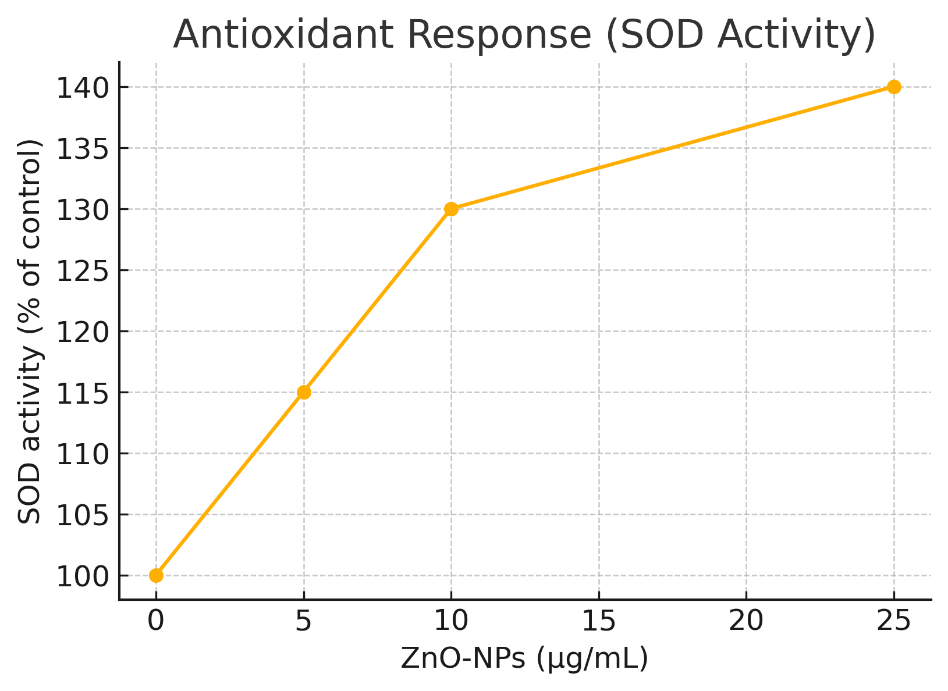

Supplement: Supplementary file 1 [file f529e7b70123458dc7ef75a7.docx]
